# Supplementary material for: High-latitude Southern Hemisphere fire history during the mid- to late Holocene (6000–750 BP)
Source: Copernicus journal article supplement (doi:10.5194/cp-14-871-2018), 2018-06-21
Supplement: Supplementary file 1 [file cp-14-871-2018-supplement.zip]

Archive with 2 entries (2 files):
- cp-14-871-2018-supplement-title-page.pdf
- rawdata_cp2018_Battistel.xlsx
