# Supplementary material for: High-latitude Southern Hemisphere fire history during the mid- to late Holocene (6000–750 BP)
Source: Copernicus journal article supplement (doi:10.5194/cp-14-871-2018), 2018-06-21
Supplement: Supplementary file 1 [file cp-14-871-2018-supplement.zip › cp-14-871-2018-supplement-title-page.pdf]

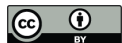

## *Supplement of*

# **High-latitude Southern Hemisphere fire history during the mid- to late Holocene (6000–750 BP)**

**Dario Battistel et al.**

*Correspondence to:* Dario Battistel ([dario.battistel@unive.it](mailto:dario.battistel@unive.it))

- [cp-14-871-2018-supplement-title-page.pdf](#)
- [rawdata\\_cp2018\\_Battistel.xlsx](#)

The copyright of individual parts of the supplement might differ from the CC BY 4.0 License.
