# Supplementary material for: High-latitude Southern Hemisphere fire history during the mid- to late Holocene (6000–750 BP)
Source: Copernicus journal article supplement (doi:10.5194/cp-14-871-2018), 2018-06-21
Supplement: Supplementary file 1 [file rawdata_cp2018_Battistel.xlsx]

## Sheet: Levoglucosan
	Data from Veres et al. cp 2013 vol. 9 pp. 1733-1748
			Acc. Rate	Levoglucosan Conc
#Sample	Depth (m)	Age (y)	1000 kg m-2 y-1	pg mL	STD	Lvg Flux (µg m-2 y-1)	STD
TD90	89	734.687	0.0849341	65.6306	10.3583	5.57427	0.879772
TD91	90	746.593	0.084968	20.3422	3.54446	1.72844	0.301166
TD92	91	758.502	0.0858905	14.6303	1.38934	1.2566	0.119331
TD93	92	770.291	0.0858476	22.5979	3.24755	1.93998	0.278795
TD94	93	781.962	0.0858043	23.5236	4.26415	2.01843	0.365883
TD95	94	793.646	0.0857594	126.345	18.6184	10.8353	1.59671
TD96	95	805.61	0.0857138	22.6906	3.10657	1.9449	0.266276
TD97	96	817.59	0.085668	33.2556	5.40516	2.84894	0.463049
TD99	98	841.336	0.0861332	98.2696	17.5021	8.46428	1.50752
TD100	99	853.024	0.0906201	70.3691	8.36328	6.37686	0.757881
TD101	100	864.398	0.0905728	97.4911	10.8901	8.83004	0.986345
TD102	101	875.662	0.0905256	77.161	12.7946	6.98504	1.15824
TD103	102	886.815	0.0904775	50.838	6.37126	4.5997	0.576455
TD104	103	898.113	0.0904285	27.3256	3.5028	2.47101	0.316753
TD105	104	909.555	0.0903791	36.6388	3.53293	3.31138	0.319303
TD106	105	921.013	0.0903185	71.2666	7.85105	6.43669	0.709095
TD107	106	932.488	0.0854134	25.9657	2.87496	2.21782	0.24556
TD108	107	944.63	0.0853623	279.664	36.0459	23.8728	3.07696	Spike
TD109	108	956.924	0.0853109	189.166	30.8797	16.1379	2.63437	Spike
TD110	109	969.235	0.085259	27.7018	4.29856	2.36183	0.366491
TD111	110	981.563	0.0852074	33.4661	4.94669	2.85156	0.421495
TD117	116	1055.55	0.0837835	29.82	3.36569	2.49842	0.281989
TD118	117	1068.02	0.083729	36.5306	5.01884	3.05867	0.420222
TD119	118	1080.52	0.0836741	12.3176	1.97079	1.03066	0.164904
TD120	119	1093.04	0.0836187	15.7727	2.80927	1.31889	0.234908
TD121	120	1105.59	0.0836492	21.8944	3.2002	1.83145	0.267694
TD122	121	1118.15	0.0847252	109.735	13.056	9.29734	1.10617
TD123	122	1130.57	0.0846685	28.3023	2.77071	2.39631	0.234592
TD124	123	1143.01	0.0846113	111.094	14.2883	9.39982	1.20895
TD125	124	1155.48	0.0845537	40.701	5.10387	3.44142	0.431551
TD126	125	1167.97	0.0844957	16.5691	2.98342	1.40002	0.252086
TD127	126	1180.49	0.0844373	236.851	31.491	19.999	2.65901	spike
TD128	127	1193.04	0.0844965	300.532	52.1796	25.3939	4.409	spike
TD129	128	1205.6	0.0871847	12.7288	2.19897	1.10976	0.191716
TD130	129	1217.79	0.0871253	24.4173	2.74133	2.12736	0.238839
TD131	130	1230	0.0870663	12.2291	1.97529	1.06474	0.171981
TD132	131	1242.25	0.0870078	120.975	15.157	10.5258	1.31877
TD133	132	1254.52	0.0869497	38.0895	6.27659	3.31187	0.545747
TD134	133	1266.81	0.0868921	23.6927	3.54907	2.05871	0.308386
TD135	134	1279.14	0.0868338	38.2176	6.13472	3.31858	0.532701
TD136	135	1291.48	0.0861005	45.6328	4.58329	3.929	0.394623
TD137	136	1303.95	0.0808718	8.92415	0.643642	0.721712	0.0520525
TD138	137	1317.25	0.0808074	19.9347	2.49875	1.61087	0.201917
TD139	138	1330.57	0.0807409	17.6368	2.43984	1.42401	0.196995
TD140	139	1343.93	0.0806724	14.0299	1.86765	1.13183	0.150668
TD141	140	1357.32	0.0806017	15.3841	1.86912	1.23998	0.150654
TD144	143	1396.42	0.0887159	56.2077	9.45243	4.98651	0.838581
TD145	144	1408.68	0.0886402	30.263	4.67652	2.68252	0.414528
TD147	146	1433.29	0.088488	11.6149	1.21061	1.02778	0.107125
TD148	147	1445.64	0.0884116	14.9139	1.89243	1.31856	0.167313
TD149	148	1458.03	0.0883349	25.8064	3.51693	2.27961	0.310668
TD150	149	1470.45	0.087804	16.9453	2.86628	1.48786	0.251671
TD151	150	1482.97	0.0815771	9.4999	0.522703	0.774974	0.0426406
TD152	151	1496.46	0.0814997	19.8566	2.27405	1.6183	0.185335
TD153	152	1510	0.081422	110.016	12.5384	8.95768	1.0209
TD154	153	1523.57	0.081344	39.5048	5.88799	3.21348	0.478953
TD155	154	1537.18	0.0812658	8.20874	0.466646	0.66709	0.0379224
TD156	155	1550.83	0.0811873	5.48464	0.540088	0.445283	0.0438483
TD157	156	1564.51	0.081161	107.035	13.5163	8.68704	1.097
TD159	158	1591.86	0.0816839	4.68681	0.437334	0.382837	0.0357231
TD160	159	1605.53	0.0816044	8.87814	0.498315	0.724496	0.0406647
TD161	160	1619.24	0.0815246	47.5086	6.69579	3.87312	0.545872
TD162	161	1632.99	0.0814446	12.2157	1.86743	0.9949	0.152092
TD163	162	1646.77	0.0813644	402.545	59.1865	32.7528	4.81568	spike
TD164	163	1660.6	0.0816177	17.8743	2.29118	1.45886	0.187001
TD165	164	1674.41	0.0851289	20.3897	3.61565	1.73575	0.307796
TD166	165	1687.67	0.0850508	15.791	2.0819	1.34303	0.177067
TD167	166	1700.97	0.0849736	63.5343	9.96401	5.39874	0.846678
TD168	167	1714.3	0.0848973	16.882	3.10142	1.43323	0.263302
TD169	168	1727.67	0.0848224	29.4875	3.13585	2.5012	0.26599
TD170	169	1741.07	0.0847492	15.7591	2.33803	1.33557	0.198146
TD171	170	1754.51	0.0847087	23.1848	3.16509	1.96395	0.26811
TD172	171	1767.97	0.0852903	30.1025	4.50502	2.56745	0.384235
TD173	172	1781.36	0.0852221	25.2312	4.8743	2.15025	0.415398
TD174	173	1794.78	0.0851552	26.3181	4.97328	2.24112	0.423501
TD175	174	1808.23	0.0850895	182.608	19.2364	15.538	1.63682
TD176	175	1821.71	0.0850251	9.574	0.411311	0.81403	0.0349718
TD177	176	1835.21	0.0849619	6.40119	0.386444	0.543857	0.032833
TD178	177	1848.74	0.0849205	688.614	102.487	58.4774	8.70323	spike
TD179	178	1862.29	0.0858266	10.948	2.0424	0.939629	0.175293
TD181	180	1889.17	0.0857087	29.774	4.32023	2.5519	0.370281
TD182	181	1902.64	0.0856516	50.4669	9.76994	4.32257	0.836811
TD183	182	1916.14	0.0855957	241.779	37.0964	20.6952	3.17529	spike
TD184	183	1929.65	0.0855411	15.8411	2.49013	1.35507	0.213009
TD185	184	1943.19	0.0854874	18.425	1.89713	1.5751	0.162181
TD186	185	1956.75	0.0845237	14.6673	1.60902	1.23974	0.136
TD187	186	1970.47	0.0777705	19.8674	3.59592	1.5451	0.279657
TD188	187	1985.39	0.0777183	13.9961	2.3798	1.08775	0.184954
TD189	188	2000.33	0.077665	15.903	2.56702	1.23511	0.199367
TD190	189	2015.29	0.0776113	19.4068	3.38081	1.50619	0.262389
TD191	190	2030.27	0.0775575	128.769	13.3343	9.98699	1.03418
TD192	191	2045.26	0.077738	27.4702	3.45627	2.13548	0.268684
TD194	193	2074.41	0.0826427	58.7744	9.04291	4.85727	0.74733
TD195	194	2088.57	0.0825881	28.384	3.67265	2.34418	0.303317
TD196	195	2102.76	0.0825335	157.257	19.7187	12.979	1.62745
TD197	196	2116.96	0.0824788	19.6686	3.15008	1.62224	0.259815
TD199	198	2145.42	0.0823995	64.916	12.1909	5.34905	1.00453
TD200	199	2159.67	0.0829835	854.752	140.482	70.9303	11.6577	spike
TD201	200	2173.83	0.0829285	176.398	26.6754	14.6284	2.21215
TD202	201	2188.01	0.0828735	32.0365	5.15694	2.65497	0.427373
TD203	202	2202.21	0.0828184	390.25	69.7372	32.3199	5.77552	spike
TD204	203	2216.42	0.0827633	85.3921	16.78	7.06733	1.38877
TD205	204	2230.66	0.0827081	15.948	1.93708	1.31903	0.160212
TD206	205	2244.91	0.0828145	13.2321	1.59884	1.09581	0.132407
TD208	207	2272.81	0.0863181	21.669	3.90211	1.87043	0.336822
TD209	208	2286.49	0.0862627	22.2089	4.44585	1.9158	0.383511
TD210	209	2300.19	0.0862073	12.3114	2.08676	1.06133	0.179894
TD211	210	2313.9	0.0861519	17.7086	2.93559	1.52563	0.252906
TD212	211	2327.63	0.0860964	21.4521	2.26027	1.84695	0.194601
TD213	212	2341.37	0.0860308	9.85659	0.595338	0.84797	0.0512174
TD214	213	2355.14	0.0824376	9.64969	0.717054	0.795497	0.0591122
TD216	215	2383.91	0.0823264	27.1487	4.32471	2.23505	0.356038
TD217	216	2398.33	0.0822708	25.7157	5.27189	2.11565	0.433722
TD218	217	2412.76	0.0822154	22.1558	3.26818	1.82155	0.268695
TD219	218	2427.22	0.08216	14.705	2.40101	1.20816	0.197267
TD220	219	2441.69	0.0821548	14.3119	2.38434	1.17579	0.195885
TD221	220	2456.18	0.0847404	15.8083	3.25854	1.3396	0.27613
TD222	221	2470.23	0.0846853	12.8009	2.4333	1.08405	0.206065
TD223	222	2484.31	0.0846304	46.8287	8.57851	3.96313	0.726002
TD224	223	2498.41	0.0845757	11.9289	2.01361	1.00889	0.170302
TD225	224	2512.53	0.0845213	46.3514	8.61301	3.91768	0.727983
TD226	225	2526.67	0.084467	10.7399	1.80917	0.907166	0.152815
TD227	226	2540.83	0.0844129	6.91026	0.61145	0.583315	0.0516143
TD228	227	2555.01	0.0838313	163.751	32.4346	13.7275	2.71904
TD229	228	2569.31	0.080215	11.0559	2.21265	0.886849	0.177488
TD230	229	2584.27	0.0801616	15.2326	1.86776	1.22107	0.149722
TD232	231	2614.26	0.0800553	15.5576	2.82835	1.24547	0.226425
TD233	232	2629.29	0.0800025	13.8191	1.70141	1.10556	0.136117
TD234	233	2644.35	0.0799202	34.6262	5.69827	2.76733	0.455407
TD235	234	2659.44	0.0793128	23.2217	2.91591	1.84178	0.231269
TD236	235	2674.66	0.0792607	21.9174	4.59498	1.73719	0.364201
TD237	236	2689.91	0.0792088	9.76287	0.594588	0.773305	0.0470966
TD238	237	2705.18	0.0791571	40.2522	4.32827	3.18625	0.342613
TD240	239	2735.81	0.0790544	13.047	2.23894	1.03142	0.176998
TD242	241	2766.55	0.0780054	44.0408	7.18603	3.43542	0.560549
TD243	242	2782.14	0.0779549	16.7838	1.93187	1.30838	0.150599
TD244	243	2797.76	0.0779046	49.0891	8.61561	3.82427	0.671196
TD245	244	2813.4	0.0778545	26.3488	4.36646	2.05137	0.339949
TD246	245	2829.06	0.0778047	32.9253	6.66863	2.56175	0.518851
TD247	246	2844.75	0.0778239	29.5884	4.8874	2.30269	0.380356
TD249	248	2875.57	0.0807822	74.4489	8.99975	6.01415	0.72702
TD250	249	2890.71	0.0807332	12.3094	1.4615	0.993775	0.117992
TD251	250	2905.88	0.0806845	14.7885	2.64626	1.1932	0.213512
TD252	251	2921.06	0.0806361	21.3473	3.1303	1.72137	0.252416
TD253	252	2936.27	0.0805878	29.2722	4.51043	2.35898	0.363486
TD254	253	2951.49	0.0803048	14.7176	2.43885	1.18189	0.195851
TD255	254	2966.78	0.0767825	25.2576	2.87542	1.93934	0.220782
TD256	255	2982.78	0.076735	7.73177	0.489397	0.593297	0.0375538
TD257	256	2998.8	0.0766876	22.8863	4.16113	1.7551	0.319107
TD258	257	3014.85	0.0766406	11.2775	1.57533	0.864313	0.120734
TD259	258	3030.91	0.0765938	10.3757	1.67981	0.794715	0.128663
TD260	259	3046.99	0.0765667	20.5626	4.36342	1.57441	0.334093
TD261	260	3063.1	0.0815909	123.585	25.1711	10.0835	2.05373
TD262	261	3078.22	0.0815448	15.9752	1.73774	1.30269	0.141704
TD263	262	3093.36	0.0814989	12.2755	1.47779	1.00044	0.120438
TD264	263	3108.52	0.0814532	19.6247	4.05673	1.59849	0.330434
TD265	264	3123.7	0.0814077	21.0403	2.28941	1.71284	0.186376
TD266	265	3138.91	0.0813625	18.5103	3.3948	1.50605	0.27621
TD267	266	3154.14	0.0811331	18.9286	3.01245	1.53573	0.24441
TD268	267	3169.42	0.0770675	24.9437	3.26903	1.92235	0.251936
TD269	268	3185.53	0.0770236	17.07	2.68217	1.31479	0.20659
TD270	269	3201.66	0.0769802	7.43929	0.60425	0.572678	0.0465153
TD271	270	3217.81	0.0769371	18.9502	3.82619	1.45797	0.294376
TD272	271	3233.99	0.0768946	8.98029	0.599968	0.690535	0.0461343
TD273	272	3250.19	0.0768524	16.7352	3.34138	1.28614	0.256793
TD275	274	3282.64	0.0775726	11.1657	1.66544	0.866155	0.129192
TD276	275	3298.75	0.0775318	15.4987	1.94365	1.20164	0.150695
TD277	276	3314.87	0.0774914	23.8261	2.94553	1.84632	0.228254
TD278	277	3331.02	0.0774513	16.4775	3.21228	1.2762	0.248795
TD279	278	3347.18	0.0774109	27.0473	5.50148	2.09376	0.425875
TD280	279	3363.37	0.0775538	16.6303	3.62602	1.28974	0.281211
TD281	280	3379.54	0.0796929	44.7646	7.32104	3.56742	0.583435
TD282	281	3395.29	0.0796518	46.7936	8.48802	3.72719	0.676086
TD284	283	3426.86	0.0795681	12.8724	2.58552	1.02424	0.205725
TD285	284	3442.67	0.0795255	7.91449	0.712463	0.629404	0.056659
TD286	285	3458.51	0.0794823	21.6237	4.16224	1.7187	0.330824
TD288	287	3490.39	0.0748394	9.14783	0.650341	0.684618	0.0486711
TD293	292	3575.07	0.0747622	13.6045	2.58402	1.0171	0.193187
TD294	293	3592.07	0.0758534	7.61411	0.618831	0.577556	0.0469404
TD295	294	3608.84	0.0758046	7.90415	0.550893	0.599171	0.0417602
TD297	296	3642.49	0.075704	4.71888	0.620705	0.357238	0.0469898
TD298	297	3659.38	0.0756514	2.31953	0.507125	0.175476	0.0383647
TD300	299	3693.19	0.0795471	10.8702	1.99851	0.864689	0.158976
TD301	300	3709.34	0.0794928	41.8213	7.84136	3.32449	0.623331
TD302	301	3725.55	0.0794393	12.3	2.70621	0.977101	0.21498
TD303	302	3741.79	0.0793869	13.7842	1.55721	1.09428	0.123622
TD304	303	3758.07	0.0793353	18.2978	2.79989	1.45166	0.22213
TD305	304	3774.4	0.0792847	5.09975	0.461598	0.404332	0.0365976
TD306	305	3790.78	0.0792729	9.27954	0.425815	0.735616	0.0337556
TD308	307	3823.64	0.0791776	20.6721	4.1467	1.63677	0.328326
TD310	309	3856.67	0.0790944	97.6095	21.0666	7.72036	1.66625
TD311	310	3873.24	0.0790592	37.1031	4.43008	2.93334	0.350239
TD313	312	3906.55	0.0767499	27.3419	4.33335	2.09849	0.332584
TD315	314	3940.94	0.076711	2.8078	0.622443	0.215389	0.0477482
TD316	315	3958.17	0.0766984	16.1458	3.11915	1.23836	0.239234
TD317	316	3975.43	0.0766905	16.2164	2.33991	1.24364	0.179448
TD318	317	3992.72	0.0762902	69.2155	12.6794	5.28046	0.967314
TD319	318	4010.11	0.0718	11.919	1.94726	0.855787	0.139813
TD320	319	4028.61	0.0718006	7.22077	0.414282	0.518456	0.0297457
TD322	321	4065.65	0.0718009	6.90764	0.459549	0.495974	0.032996
TD323	322	4084.21	0.0717989	6.92069	0.526151	0.496898	0.037777
TD324	323	4102.79	0.072561	3.39157	0.779552	0.246096	0.0565651
TD325	324	4121.21	0.0793226	4.70503	0.579601	0.373215	0.0459755
TD326	325	4138.07	0.0793163	6.18638	0.588472	0.490681	0.0466754
TD327	326	4154.97	0.0793085	5.03051	0.414427	0.398963	0.0328676
TD328	327	4171.89	0.0792993	8.22697	0.719771	0.652393	0.0570773
TD330	329	4205.82	0.0789078	5.91459	0.379895	0.466708	0.0299767
TD331	330	4222.91	0.0729628	4.74274	0.676175	0.346043	0.0493356
TD332	331	4241.43	0.0729472	12.6164	1.49467	0.920329	0.109032
TD333	332	4259.98	0.0729301	3.79266	0.41437	0.276599	0.03022
TD334	333	4278.58	0.0729112	5.91887	0.8412	0.431552	0.0613329
TD335	334	4297.21	0.0728908	5.52947	0.33809	0.403047	0.0246436
TD336	335	4315.88	0.0731328	11.352	2.67477	0.830203	0.195614
TD337	336	4334.53	0.0759675	28.1454	6.11603	2.13814	0.464619
TD339	338	4370.54	0.0759209	7.75701	0.50488	0.588919	0.0383309
TD340	339	4388.6	0.0758969	10.5225	2.04455	0.798624	0.155175
TD341	340	4406.7	0.0758725	9.96786	1.55533	0.756287	0.118007
TD342	341	4424.83	0.0760365	7.72722	0.646725	0.58755	0.0491747
TD343	342	4442.95	0.0782916	7.80462	0.510309	0.611036	0.0399529
TD344	343	4460.56	0.0782704	7.18858	0.612943	0.562653	0.0479753
TD345	344	4478.19	0.0782513	8.40821	0.475749	0.657953	0.0372279
TD348	347	4531.24	0.0779497	8.7452	1.27797	0.681686	0.0996175
TD349	348	4549.02	0.0733841	10.2172	2.45371	0.749782	0.180063
TD351	350	4586.88	0.0733818	3.47665	0.627185	0.255123	0.046024
TD352	351	4605.85	0.0733854	4.95744	0.522769	0.363804	0.0383636
TD354	353	4643.85	0.0733929	5.30947	0.439549	0.389678	0.0322598
TD355	354	4662.88	0.0733962	5.75489	0.809099	0.422387	0.0593848
TD356	355	4681.93	0.0734117	8.59876	0.508664	0.63125	0.0373419
TD357	356	4700.99	0.0734284	6.88432	0.442573	0.505505	0.0324974
TD358	357	4720.06	0.0734458	12.0287	2.8161	0.883459	0.206831
TD359	358	4739.14	0.0734636	17.3531	2.47108	1.27482	0.181534
TD360	359	4758.22	0.0735475	22.3616	4.50902	1.64464	0.331627
TD361	360	4777.29	0.0740272	7.88603	0.37667	0.58378	0.0278838
TD362	361	4796.24	0.0740455	11.4636	1.66251	0.848825	0.123102
TD363	362	4815.2	0.0740641	11.5424	1.99473	0.854879	0.147738
TD364	363	4834.16	0.0740834	14.3309	2.43946	1.06168	0.180724
TD365	364	4853.12	0.0741691	29.4279	5.39475	2.18264	0.400124
TD366	365	4872.07	0.0794966	4.53526	0.406252	0.360538	0.0322956
TD367	366	4889.76	0.0795167	14.7327	2.73426	1.17149	0.217419
TD368	367	4907.45	0.0795366	10.0542	1.44423	0.799675	0.114869
TD369	368	4925.15	0.0795562	7.16205	0.59433	0.569786	0.0472826
TD370	369	4942.85	0.0795756	7.10396	0.500626	0.565302	0.0398376
TD371	370	4960.57	0.0795948	10.8162	2.53768	0.860914	0.201986
TD372	371	4978.28	0.078358	5.11519	0.639597	0.400816	0.0501175
TD373	372	4996.28	0.0711999	5.30154	0.420805	0.377469	0.0299613
TD374	373	5016.1	0.0712182	6.35272	0.663339	0.45243	0.0472418
TD375	374	5035.93	0.0712362	6.8072	0.598046	0.484919	0.0426025
TD376	375	5055.75	0.0712539	5.473	0.510978	0.389972	0.0364092
TD378	377	5095.37	0.0718088	6.13827	0.552043	0.440782	0.0396416
TD379	378	5115.04	0.0718265	6.43694	0.659414	0.462343	0.0473634
TD380	379	5134.71	0.0718446	7.32034	0.629216	0.525927	0.0452058
TD383	382	5193.73	0.0661826	8.3175	0.820782	0.550474	0.0543215
TD384	383	5215.08	0.066202	4.60005	0.421974	0.304532	0.0279355
TD385	384	5236.43	0.0662216	5.07289	0.532736	0.335935	0.0352786
TD387	386	5279.13	0.0664326	4.40304	0.42901	0.292506	0.0285002
TD388	387	5300.42	0.0747112	7.85172	0.675433	0.586611	0.0504624
TD390	389	5338.29	0.0747533	8.51988	0.495754	0.636889	0.0370592
TD391	390	5357.23	0.0747743	7.21988	0.538207	0.539862	0.040244
TD393	392	5395.12	0.0747308	16.5155	2.47495	1.23422	0.184955
TD394	393	5414.09	0.0738887	9.74543	1.89882	0.720077	0.140302
TD396	395	5452.49	0.0739381	6.8057	0.427013	0.5032	0.0315725
TD397	396	5471.69	0.0739657	14.4393	2.44481	1.06801	0.180832
TD399	398	5510.14	0.0680424	32.8217	6.99543	2.23327	0.475986
TD400	399	5531.06	0.0680755	20.5547	4.60877	1.39927	0.313744
TD403	402	5593.84	0.0682545	16.1946	2.67957	1.10535	0.182893
